# Supplementary material for: Biomarkers for prediction of renal replacement therapy in acute kidney injury: a systematic review and meta-analysis
Source: PubMed Central journal article supplement — Intensive Care Med. 2018 Mar 14;44(3):323–36. doi: 10.1007/s00134-018-5126-8 (PMC5861176; doi:10.1007/s00134-018-5126-8), 2018-03-14

Appendix for:  
**Biomarkers for Prediction of Renal Replacement Therapy in Acute Kidney Injury: A Systematic Review and Meta-Analysis**

## 1. Search Strategies

### Embase

Embase search strategy:

- 1 biomarker (139901)
- 2 NGAL OR neutrophil gelatinase-associated lipocalin OR neutrophil gelatinase associated lipocalin (6910)
- 3 KIM-1 OR kidney injury molecule-1 (1462)
- 4 cystatin c OR cystatin-c (9633)
- 5 L-FABP OR fatty acid-binding protein 1 (1049)
- 6 IL-18 OR interleukin-18 or interleukin 18 (17305)
- 7 IGFBP7 OR IGF-binding protein-7 OR IGF binding protein 7 (433)
- 8 TIMP2 OR tissue inhibitor metalloproteinase-2 (1029)
- 9 calprotectin (3997)
- 10 CAF OR c-terminal agrin fragment OR c terminal agrin fragment (4427)
- 11 L1 OR L2 OR L3 OR L4 OR L5 OR L6 OR L7 OR L8 OR L9 OR L10
- 12 AKI OR acute kidney injury OR acute kidney failure OR acute renal failure (80015)
- 13 RRT or renal replacement therapy or ?dialysis OR CVVH? OR (hemofiltration OR haemofiltration) OR (CRRT OR continuous renal replacement therapy) (279067)
- 14 L11 AND L12 AND L13 (947)
- 15 L14 NOT MEDLINE/FS (913)
- 16 L14 NOT REVIEW/DT (752)

752 Search results

Results obtained September 19, 2017

### Pubmed

Pubmed/NIH search strategy:

(biomarker

OR (NGAL OR „Neutrophil gelatinase-associated lipocalin“ OR „Neutrophil gelatinase associated lipocalin“)

OR (KIM-1 OR „Kidney Injury Molecule-1“)

OR („Cystatin C“ OR „Cystatin-C“)

OR (L-FABP OR „Fatty acid-binding protein 1,“ )

OR (IL-18 OR „Interleukin-18“ OR „Interleukin 18“)

OR (IGFBP7 OR „IGF-Binding Protein-7“ OR „IGF Binding Protein 7“)

OR (TIMP2 OR „Tissue Inhibitor Metalloproteinase-2“)

OR Calprotectin

OR (CAF OR „c-terminal agrin fragment“ OR „c terminal agrin fragment“))

AND (aki OR „acute kidney injury“ OR „acute kidney failure“ OR „acute renal failure“)

AND (rrt OR „renal replacement therapy“ OR \*dialysis OR CVVH\* OR (hemofiltration OR haemofiltration) OR (CRRT OR „continous renal replacement therapy“))

NOT Review[ptyp]

656 Search results

Results obtained September 19, 2017

## CENTRAL

CENTRAL search strategy:

| ID  | Search Hits                                                                                                                                                |
|-----|------------------------------------------------------------------------------------------------------------------------------------------------------------|
| #1  | biomarker 5980                                                                                                                                             |
| #2  | (NGAL or "Neutrophil gelatinase-associated lipocalin" or "Neutrophil gelatinase associated lipocalin") 370                                                 |
| #3  | (KIM-1 or "Kidney Injury Molecule-1") 113                                                                                                                  |
| #4  | ("Cystatin C" or "Cystatin-C") 516                                                                                                                         |
| #5  | (L-FABP or "Fatty acid-binding protein 1") 54                                                                                                              |
| #6  | (IL-18 or "Interleukin-18" or "Interleukin 18") 392                                                                                                        |
| #7  | (IGFBP7 or "IGF-Binding Protein-7" or "IGF Binding Protein 7") 17                                                                                          |
| #8  | (TIMP2 or "Tissue Inhibitor Metalloproteinase-2" or TIMP-2) 70                                                                                             |
| #9  | Calprotectin 325                                                                                                                                           |
| #10 | (CAF or "c-terminal agrin fragment" or "c terminal agrin fragment") 541                                                                                    |
| #11 | (aki or "acute kidney injury" or "acute kidney failure" or "acute renal failure") 3179                                                                     |
| #12 | (rrt or "renal replacement therapy" or *dialysis or CVVH* or (hemofiltration or haemofiltration) or (CRRT or "continous renal replacement therapy")) 15562 |
| #13 | #2 or #3 or #4 or #5 or #6 or #7 or #8 or #9 or #10 2163                                                                                                   |
| #14 | #1 or #13 7962                                                                                                                                             |
| #15 | #14 and #11 and #12 115                                                                                                                                    |

115 Search results (93 Trials, 1 Econ. Eval., 21 Reviews excluded)

Results obtained September 19, 2017

## 2. Supplemental figures and tables

### 2.1. Supplemental figures and tables for the study selection and QUADAS-2 risk of bias assessment

Fig. 7 Flow chart of study selection

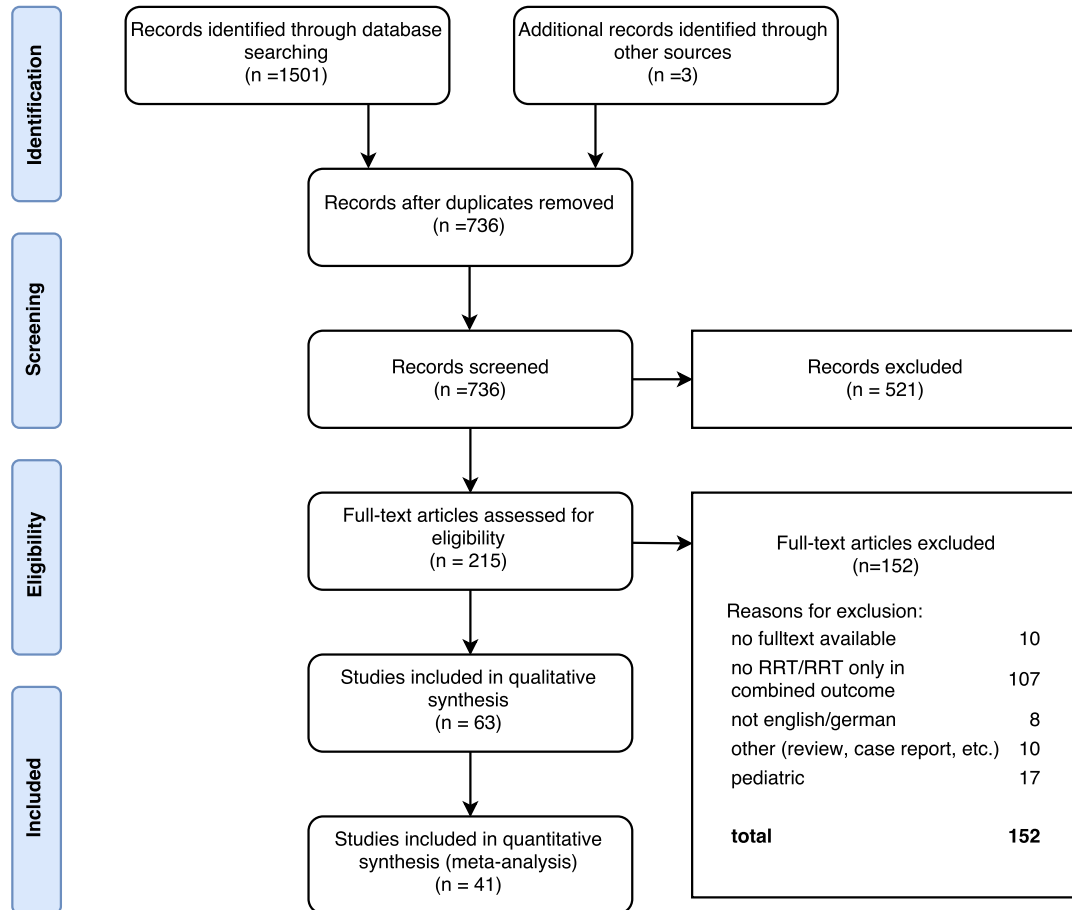

## QUADAS-2 risk of bias assessment (Fig.8 and Tab.2)

QUADAS-2 risk of bias assessment is performed in four domains:

Risk of bias in the domain 'patient selection' evaluated the methods of patient selection (e.g. if a consecutive or random sample of patients was enrolled or if the study avoided inappropriate exclusions); the applicability judgment was based on whether there was concern that the included patients matched the review question or not.

Risk of bias in the domain 'index test' states, whether there was concern that the conduct and interpretation (e.g. if the laboratory personal was blinded to the patient's condition) of the index test lead to possible bias, while the applicability judgment was based on whether there was concern that the index test, its conduct or the interpretation differed from the review question or not.

The domain 'RRT initiation' states whether there was a possible risk of bias regarding the initiation of RRT (eg. what criteria were used to classify the need for RRT initiation and if the decision to initiate RRT was made without knowledge of the biomarker results). The applicability judgment in this domain was based on whether there was concern that the initiation of RRT matched the review question.

In the domain 'flow and timing' judgment for risk of bias was based on whether there was concern if e.g. some patients were excluded from the analysis or if there was an appropriate interval between critical illness and RRT.

**Fig. 8** Results of the QUADAS-2 risk of bias assessment.

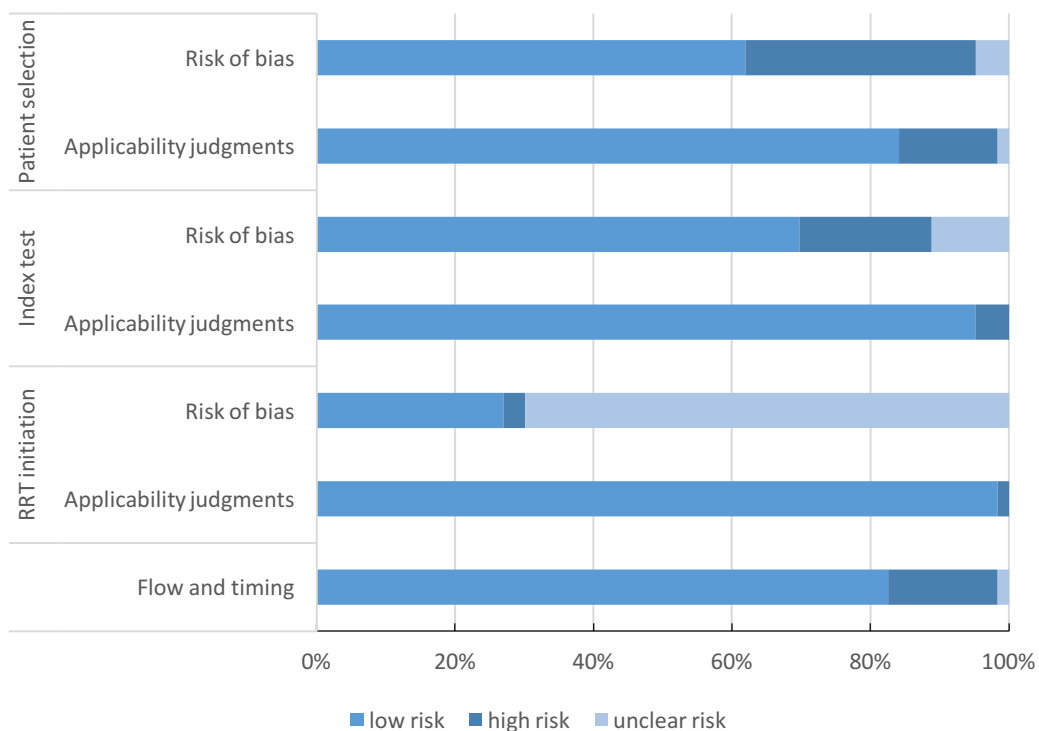

**Tab. 2** Results of the QUADAS-2 risk of bias assessment

| Author/Year                       | Patient selection |                          | Index Test   |                          | RRT Initiation |                          | Flow & Timing |
|-----------------------------------|-------------------|--------------------------|--------------|--------------------------|----------------|--------------------------|---------------|
|                                   | Risk of bias      | Applicability judgements | Risk of bias | Applicability judgements | Risk of bias   | Applicability judgements |               |
| Albeladi et al. 2017 [28]         | low               | low                      | low          | low                      | low            | low                      | Low           |
| Alge et al. 2013 [59]             | low               | low                      | high         | high                     | high           | low                      | Low           |
| Bagshaw et al. 2010 [29]          | low               | low                      | high         | low                      | high           | low                      | low           |
| Cemil et al. 2014 [19]            | high              | low                      | high         | low                      | low            | low                      | high          |
| Chun et al. 2017 [80]             | low               | low                      | unclear      | low                      | unclear        | low                      | low           |
| Constantin et al. 2010 [30]       | low               | low                      | low          | low                      | unclear        | low                      | low           |
| Cruz et al. 2009 [31]             | low               | low                      | low          | low                      | unclear        | low                      | low           |
| de Geus et al. 2011 [32]          | low               | low                      | low          | low                      | unclear        | low                      | low           |
| Dihazi et al. 2016 [33]           | low               | low                      | low          | low                      | low            | low                      | low           |
| Drey et al. 2015 [75]             | low               | low                      | high         | low                      | unclear        | low                      | low           |
| Du et al. 2013 [60]               | high              | low                      | high         | low                      | unclear        | low                      | low           |
| Dusse et al. 2016 [64]            | low               | low                      | low          | low                      | unclear        | low                      | low           |
| Endre et al. 2010 [35]            | low               | low                      | low          | high                     | unclear        | low                      | low           |
| Endre et al. 2011 [34]            | low               | low                      | low          | high                     | unclear        | low                      | low           |
| Gaipov et al. 2015 [67]           | low               | low                      | high         | low                      | unclear        | low                      | low           |
| Garcia-Alvarez et al. 2015 [61]   | low               | low                      | high         | low                      | unclear        | low                      | high          |
| Glassford et al. 2013 [36]        | low               | low                      | low          | low                      | unclear        | low                      | low           |
| Gocze et al. 2015 [68]            | low               | low                      | low          | low                      | unclear        | low                      | low           |
| Haase-Fielitz et al. 2009 [65]    | high              | low                      | low          | low                      | low            | low                      | high          |
| Haase-Fielitz et al. 2011 [62]    | high              | low                      | low          | low                      | low            | low                      | low           |
| Haines et al. 2017 [37]           | low               | low                      | low          | low                      | unclear        | low                      | low           |
| Hanson et al. 2011 [77]           | high              | high                     | high         | low                      | low            | low                      | low           |
| Herget-Rosenthal et al. 2004 [38] | low               | low                      | low          | low                      | unclear        | low                      | low           |
| Herget-Rosenthal et al. 2004 [20] | low               | low                      | low          | low                      | low            | low                      | low           |
| Hjortrup et al. 2015 [74]         | high              | unclear                  | low          | low                      | unclear        | low                      | low           |
| Ho et al. 2017 [21]               | low               | low                      | unclear      | low                      | unclear        | low                      | low           |
| Hu et al. 2017 [70]               | low               | low                      | low          | low                      | unclear        | low                      | low           |
| Itenov et al. 2016 [39]           | high              | low                      | low          | low                      | unclear        | low                      | low           |
| Jalkanen et al. 2013[40]          | low               | low                      | high         | low                      | unclear        | low                      | low           |
| Kiessling et al. 2014[58]         | high              | high                     | low          | low                      | low            | low                      | low           |
| Kim et al. 2017 [76]              | low               | low                      | low          | low                      | unclear        | low                      | low           |
| Koyner et al. 2015 [41]           | high              | low                      | low          | low                      | unclear        | low                      | low           |
| Koziolek et al. 2012 [42]         | low               | low                      | high         | low                      | low            | low                      | low           |
| Linko et al. 2013 [43]            | high              | high                     | low          | low                      | unclear        | low                      | high          |
| Lukasz et al. 2014 [79]           | low               | high                     | low          | low                      | unclear        | low                      | low           |
| Mahdavi-Mazdeh et al. 2012 [73]   | high              | high                     | low          | low                      | low            | high                     | low           |
| Maisel et al. 2016 [22]           | low               | low                      | low          | low                      | unclear        | low                      | low           |
| Mårtensson et al. 2017 [44]       | low               | low                      | low          | low                      | unclear        | low                      | low           |
| McIlroy et al. 2015 [66]          | high              | low                      | low          | low                      | unclear        | low                      | low           |
| Nejat et al. 2010 [45]            | high              | high                     | low          | low                      | unclear        | low                      | high          |
| Nisula et al. 2014 [46]           | low               | low                      | low          | low                      | unclear        | low                      | low           |
| Nisula et al. 2015 [47]           | low               | low                      | low          | low                      | unclear        | low                      | low           |
| O'Sullivan et al. 2017 [48]       | high              | low                      | low          | low                      | unclear        | low                      | low           |
| Park et al. 2013 [23]             | low               | low                      | low          | low                      | low            | low                      | low           |
| Pianta et al. 2015 [72]           | high              | high                     | unclear      | low                      | low            | low                      | low           |
| Pickering et al. 2012 [50]        | low               | low                      | low          | low                      | unclear        | low                      | unclear       |
| Pickering et al. 2013 [49]        | high              | low                      | low          | low                      | unclear        | low                      | high          |
| Pipili et al. 2014 [51]           | high              | low                      | unclear      | low                      | low            | low                      | low           |
| Plewes et al. 2017 [78]           | low               | high                     | low          | low                      | low            | low                      | low           |
| Ralib et al. 2012 [52]            | low               | low                      | low          | low                      | unclear        | low                      | high          |
| Renhua et al. 2014 [24]           | high              | low                      | low          | low                      | unclear        | low                      | low           |
| Rewa et al. 2015 [25]             | low               | low                      | high         | low                      | unclear        | low                      | high          |
| Royakkers et al. 2011 [54]        | high              | low                      | low          | low                      | unclear        | low                      | low           |
| Royakkers et al. 2012 [53]        | high              | low                      | low          | low                      | low            | low                      | low           |
| Shum et al. 2015 [69]             | low               | low                      | high         | low                      | low            | low                      | low           |
| Siew et al. 2010 [55]             | low               | low                      | low          | low                      | unclear        | low                      | high          |
| Siew et al. 2013 [56]             | low               | low                      | low          | low                      | unclear        | low                      | high          |

| Author/Year                     | Patient selection |                          | Index Test   |                          | RRT Initiation |                          | Flow & Timing |
|---------------------------------|-------------------|--------------------------|--------------|--------------------------|----------------|--------------------------|---------------|
|                                 | Risk of bias      | Applicability judgements | Risk of bias | Applicability judgements | Risk of bias   | Applicability judgements |               |
| Skinner et al. 2017 [81]        | low               | low                      | low          | low                      | unclear        | low                      | low           |
| Srisawat et al. 2011 [26]       | high              | low                      | unclear      | low                      | unclear        | low                      | low           |
| Sumida et al. 2014 [63]         | unclear           | low                      | unclear      | low                      | unclear        | low                      | low           |
| Susantitaphong et al. 2012 [27] | low               | high                     | low          | low                      | unclear        | low                      | low           |
| Tiranathanagul et al. 2013 [57] | unclear           | low                      | unclear      | low                      | low            | low                      | low           |
| Valette et al. 2013 [71]        | unclear           | low                      | low          | low                      | unclear        | low                      | low           |

## 2.2. Supplemental forest plots

**Fig. 9** Forest plots of urinary IL-18 predicting RRT.

**Fig. 9a** Urinary concentration of IL-18.

### Urinary IL-18 (urinary Concentration)

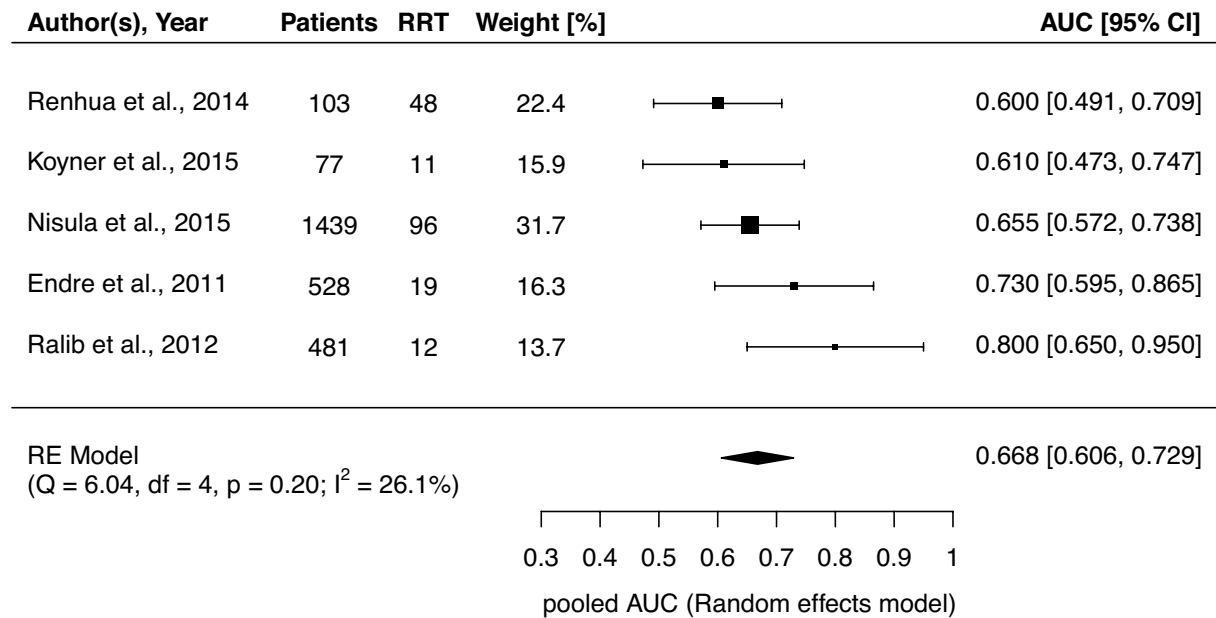

**Fig. 9b** Urinary IL-18 normalized to urinary creatinine.

### Urinary IL-18 (normalized to urinary Creatinine)

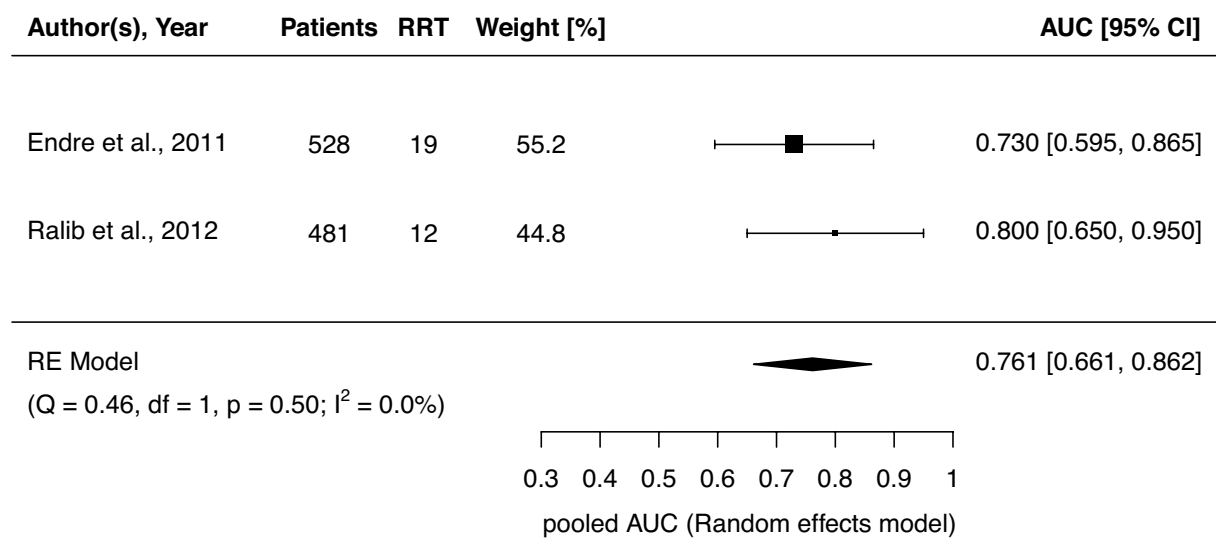

**Fig. 10** Forest plots of urinary cystatin C (conc.) predicting RRT

**Urinary Cystatin C (urinary Concentration)**

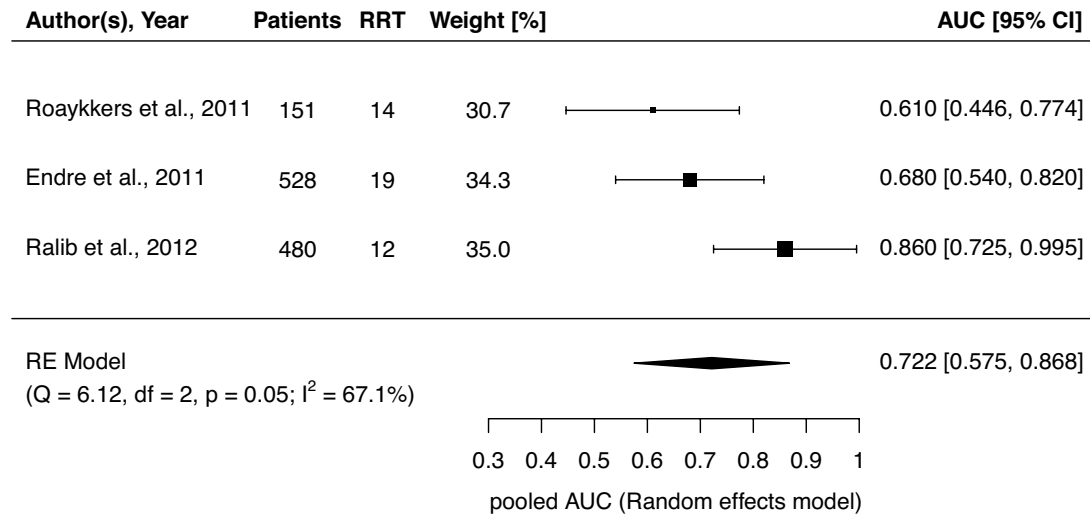

**Fig. 11** Forest plots of urinary KIM-1 predicting RRT.

**Fig.11a** Urinary concentration of KIM-1.

**Urinary KIM-1 (urinary concentration)**

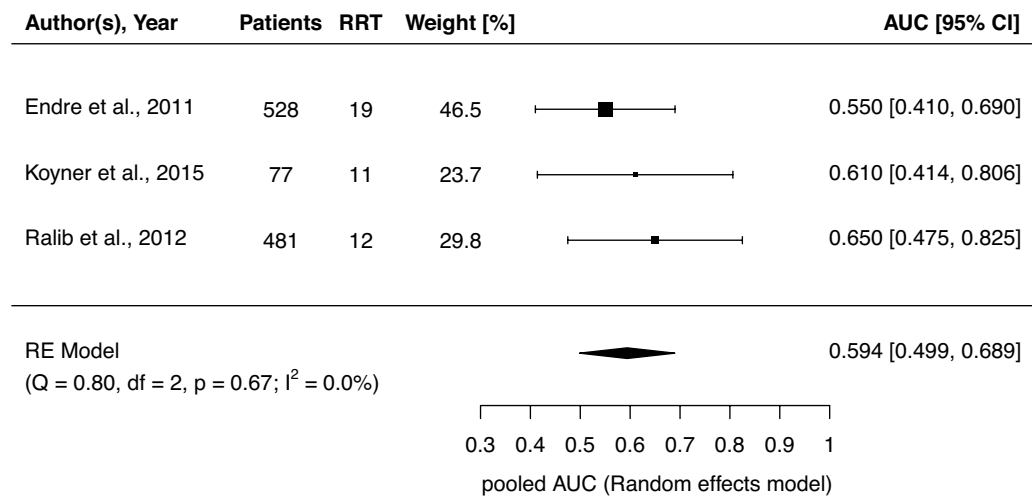



**Fig. 11b** Urinary KIM-1 normalized to urinary creatinine

**Urinary KIM-1 (normalized to urinary Creatinine)**

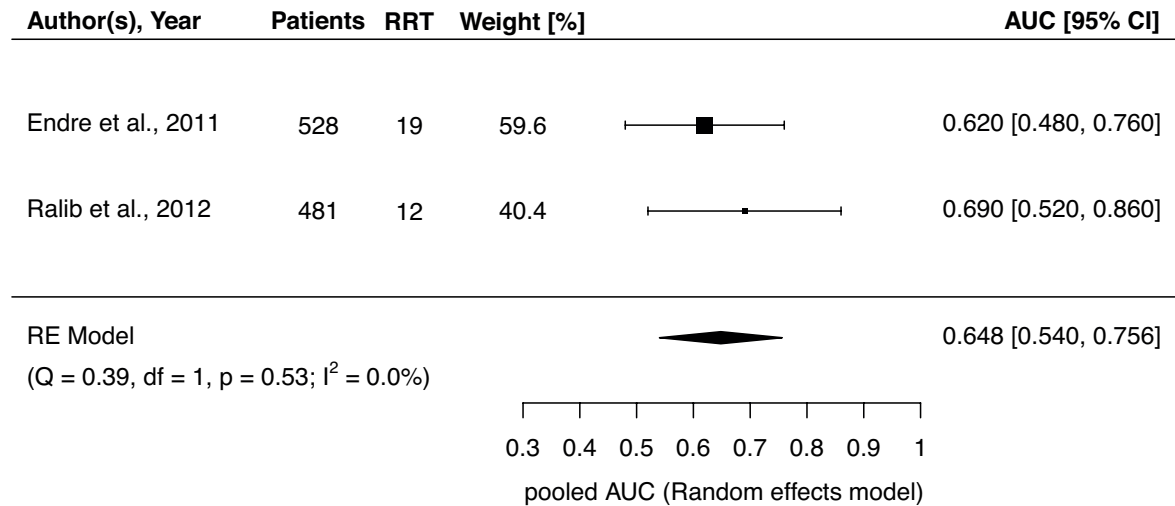

**Fig. 12a** Forest plot of urinary TIMP-2 predicting RRT. **Fig. 12b** Forest plot of urinary IGFBP-7 predicting RRT

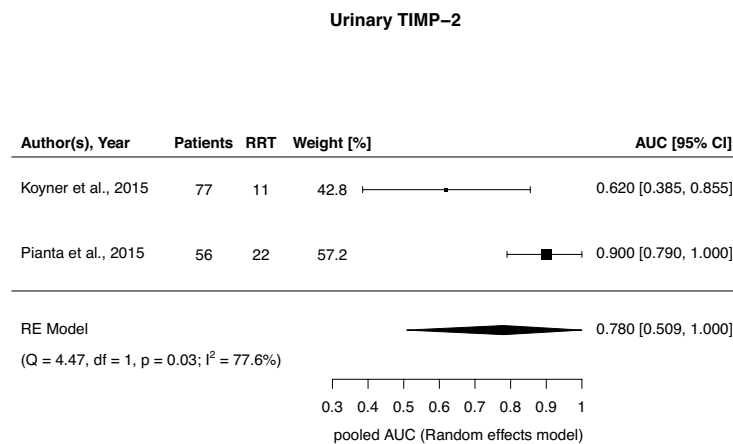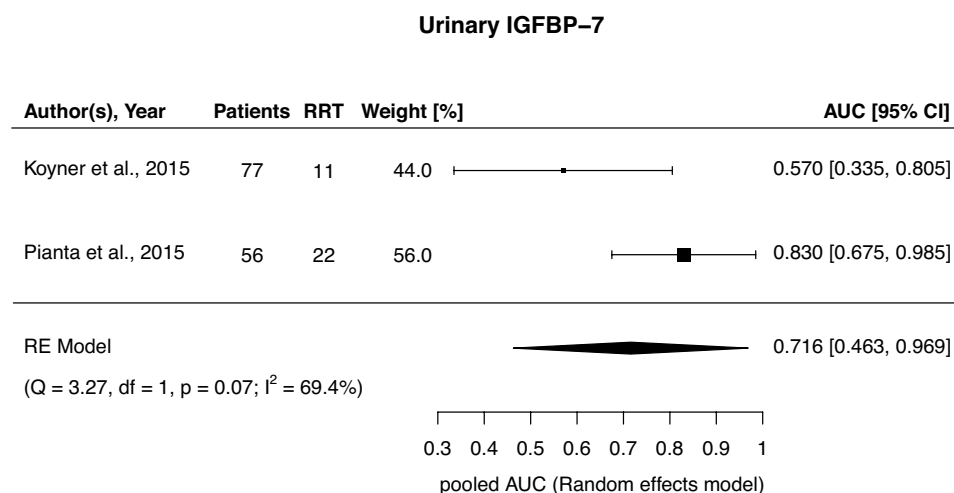

**Fig. 13a** Forest plot of urine output predicting RRT  
**Urine Output**

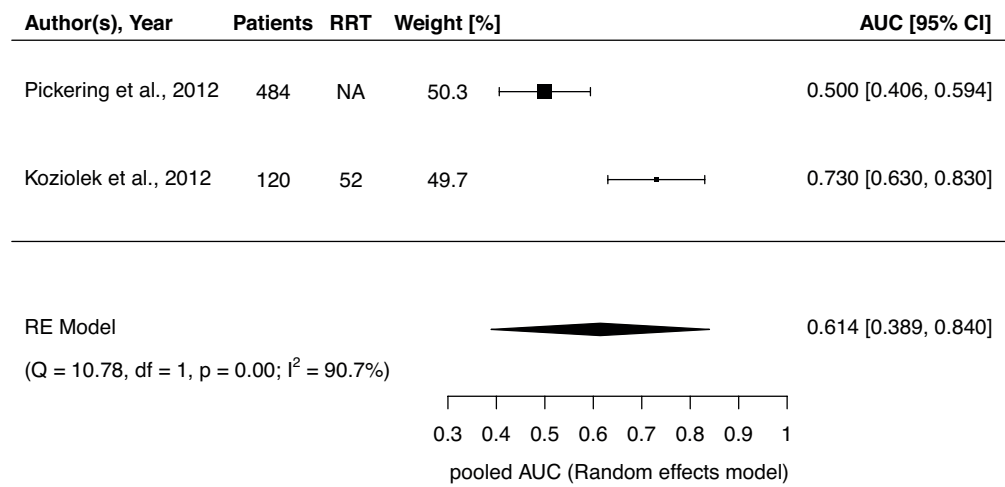

**Fig. 13b** Forest plot of urinary NAG normalized to urinary creatinine predicting RRT  
**Urinary NAG (normalized to urinary Creatinine)**

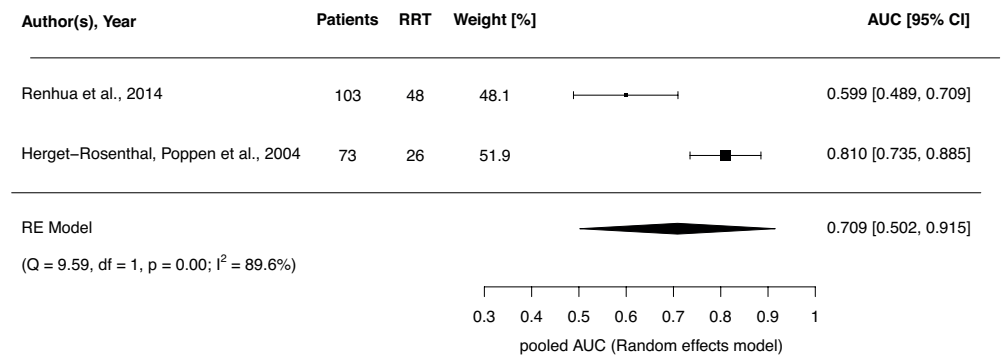

**Fig. 13c** Forest plot of the Fractional Excretion of Sodium predicting RRT  
**Fractional Excretion of Sodium**

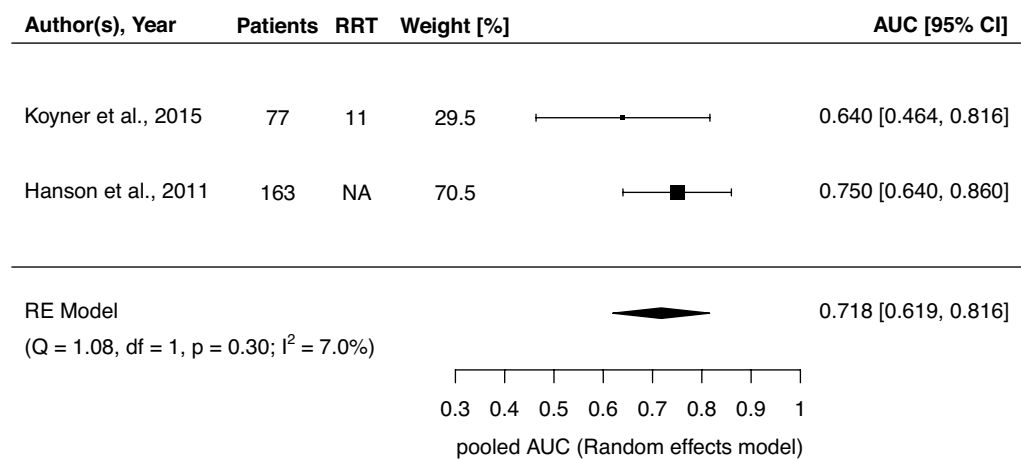

**Fig. 13d** Forest plot of blood urea nitrogen predicting RRT

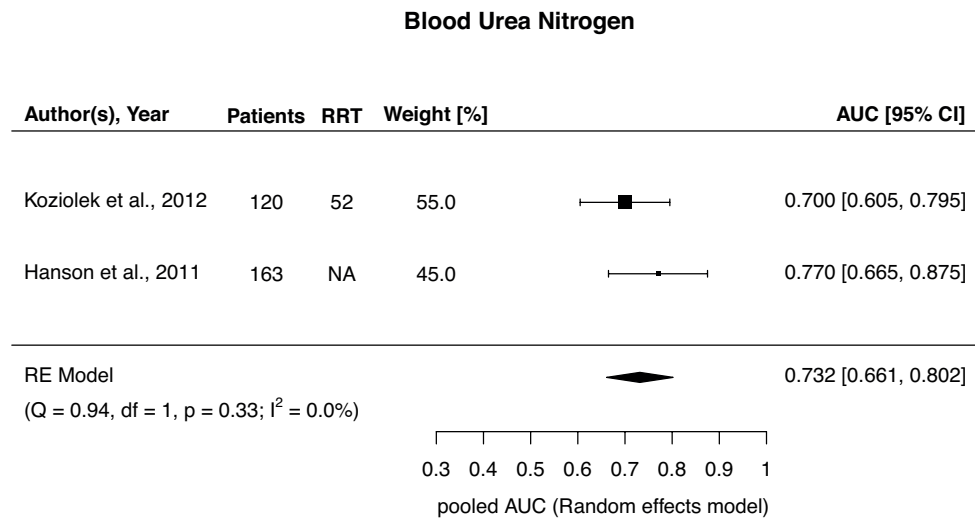

**Fig. 14** Funnel plots of biomarkers evaluated in at least 10 studies

**Fig. 14a** Funnel plot for the urinary concentration of urinary NGAL

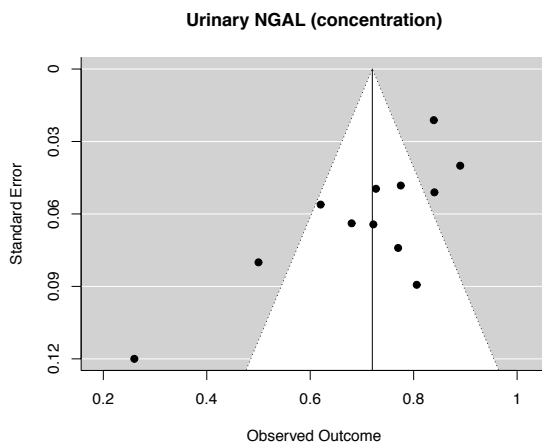

**Fig. 14b** Funnel plot for plasma, serum and whole blood NGAL

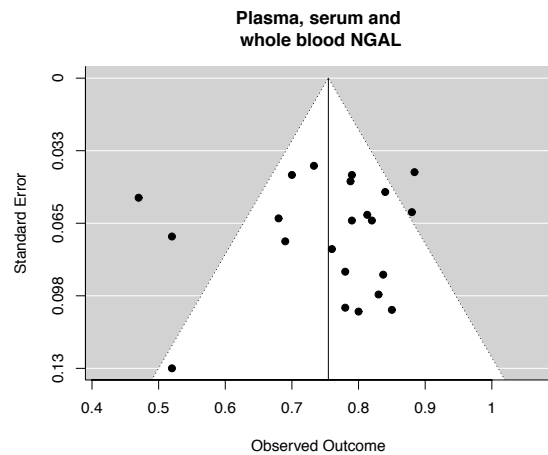

**Fig. 14c** Funnel plot for plasma and serum creatinine

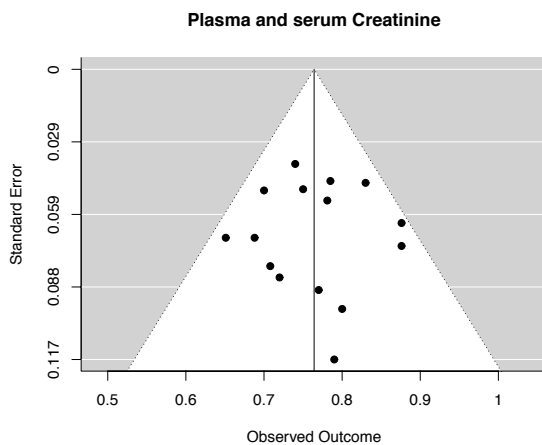

**Tab. 3** Differences between pooled AUCs for urinary biomarkers

|            | <b>IL-18</b><br>urinary conc. vs.<br>normalized to urinary<br>creatinine | <b>Cystatin C</b><br>urinary conc. vs.<br>normalized to urinary<br>creatinine | <b>KIM-1</b><br>urinary conc. vs.<br>normalized to urinary<br>creatinine |
|------------|--------------------------------------------------------------------------|-------------------------------------------------------------------------------|--------------------------------------------------------------------------|
| Difference | 0.007                                                                    | 0.068                                                                         | 0.054                                                                    |
| p-value    | 0.8863                                                                   | 0.5172                                                                        | 0.4618                                                                   |

**Tab. 4** Differences between pooled AUCs for NGAL

|            | <b>NGAL</b><br>plasma vs. serum | <b>blood NGAL</b><br>vs. urinary NGAL<br>(concentration) | <b>blood NGAL</b><br>vs. urinary NGAL<br>(normalized) |
|------------|---------------------------------|----------------------------------------------------------|-------------------------------------------------------|
| Difference | 0.114                           | 0.035                                                    | 0.028                                                 |
| p-value    | 0.1593                          | 0.4735                                                   | 0.4260                                                |

**Tab. 5** Differences between pooled AUCs for blood creatinine and cystatin C

|            | <b>Creatinine</b><br>plasma vs. serum | <b>Cystatin C</b><br>plasma vs. serum | p+s <b>Cystatin C</b><br>vs. urinary CysC<br>(concentration) | p+s <b>Cystatin C</b><br>vs. urinary CysC<br>(normalized) |
|------------|---------------------------------------|---------------------------------------|--------------------------------------------------------------|-----------------------------------------------------------|
| Difference | 0.013                                 | 0.077                                 | 0.046                                                        | 0.022                                                     |
| p-value    | 0.7178                                | 0.3310                                | 0.5520                                                       | 0.7733                                                    |

### 3. Sensitivity analyses

#### 3.1. Inclusion of moderators into the Random Effects Model

To address the between-trial heterogeneity, moderators (number of patients receiving RRT) were added to the random-effects model on an exploratory basis, but no significant findings were noticed during this process.

For *plasma/serum/whole blood NGAL*, the test for residual heterogeneity and for moderators shows no significant influence of the incidence of RRT. The residual heterogeneity decreases from  $Q=69.18$  ( $df=21$ ) to  $Q=69.1$  ( $df=20$ ). The effect of the incidence of RRT is not statistical significant:  $Q=0.02$  ( $df=1$ ). For *plasma/serum creatinine*, the test for residual heterogeneity and for moderators shows no significant influence of the incidence of RRT. The residual heterogeneity decreases from  $Q=15.23$  ( $df=14$ ) to  $Q=8.83$  ( $df=9$ ). The effect of the incidence of RRT is not statistical significant:  $Q=0.07$  ( $df=1$ ).

For *plasma/serum cystatin C*, the test for residual heterogeneity and for moderators shows no significant influence of the incidence of RRT. The residual heterogeneity decreases from  $Q=4.9$  ( $df=6$ ) to  $Q=2.75$  ( $df=4$ ). The effect of the incidence of RRT is not statistical significant:  $Q=0.01$  ( $df=1$ ).

For *urinary TIMP-2\*IGFBP-7*, the test for residual heterogeneity and for moderators shows no significant influence of the incidence of RRT. The residual heterogeneity decreases from  $Q= 5.7$  ( $df=3$ ) to  $Q=5.66$  ( $df=2$ ). The effect of the incidence of RRT is not statistical significant:  $Q=0.00$  ( $df=1$ ).

For *urinary cystatin C (conc.)*, the test for residual heterogeneity and for moderators shows no significant influence of the incidence of RRT. The residual heterogeneity decreases from  $Q=6.12$  ( $df=2$ ) to  $Q=4.02$  ( $df=1$ ). The effect of the incidence of RRT is not statistical significant:  $Q=0.38$  ( $df=1$ ).

For *urinary cystatin C (norm.)*, the test for residual heterogeneity and for moderators shows no significant influence of the incidence of RRT. The residual heterogeneity decreases from  $Q=19.70$  ( $df=3$ ) to  $Q=11.62$  ( $df=2$ ). The effect of the incidence of RRT is not statistical significant:  $Q=0.48$  ( $df=1$ ).

For *urinary NGAL (conc.)*, the test for residual heterogeneity and for moderators shows no significant influence of the incidence of RRT. The residual heterogeneity decreases from  $Q=60.25$  ( $df=11$ ) to  $Q=45.58$  ( $df=9$ ). The effect of the incidence of RRT is not statistical significant:  $Q=1.45$  ( $df=1$ ).

For *urinary NGAL (norm.)*, the test for residual heterogeneity and for moderators shows no significant influence of the incidence of RRT. The residual heterogeneity decreases from  $Q=12.94$  ( $df=6$ ) to  $Q=12.84$  ( $df=5$ ). The effect of the incidence of RRT is not statistical significant:  $Q=0.14$  ( $df=1$ ).

For *urinary IL-18 (conc.)*, the test for residual heterogeneity and for moderators shows no significant influence of the incidence of RRT. The residual heterogeneity decreases from  $Q=6.04$  ( $df=4$ ) to  $Q=5.44$  ( $df=3$ ). The effect of the incidence of RRT is not statistical significant:  $Q=0.41$  ( $df=1$ ).

For *urinary KIM-1 (conc.)*, the test for residual heterogeneity and for moderators shows no significant influence of the incidence of RRT. The residual heterogeneity decreases from  $Q=0.80$  ( $df=2$ ) to  $Q=0.14$  ( $df=1$ ). The effect of the incidence of RRT is not statistical significant:  $Q=0.65$  ( $df=1$ ).

It was not possible to add moderators to the RE models of BUN, FeNa, TIMP-2, IL-18 (norm.), IGFBP-7, NAG, KIM-1 (norm.) and UO due to the limited number of studies included in these RE models.

### **3.2. Paired analysis of biomarkers reported in the same study**

Another process applied to address between-trial heterogeneity was to pair biomarkers reported in the same studies and create an estimate of the average AUC improvement for those biomarkers.

When comparing plasma, serum and whole blood NGAL and plasma/serum creatinine in studies that provide results for both biomarkers, the performance of NGAL is slightly better than creatinine (AUC improvement Hjortrup -0.04, Valette +0.04, Pickering +0.07, Tiranathanagul +0.10, Sumida +0.06, Maisel +0.01, Gaipov -0.13, Mahdavi-Mazdeh +0.00, average AUC improvement 0.013) as opposed to the pooled AUC from the unpaired analysis.

The trend for plasma/serum cystatin C of outperforming plasma/serum creatinine still holds true after pairing those biomarkers (Nejat +0.07, Koziolk +0.04, Pipili -0.02, Renhua -0.013, Kiessling -0.03, average AUC improvement 0.01).

Urinary TIMP-2 which is outperformed by TIMP-2\*IGFBP-7 in the pooled analysis, shows improved performance, indicating a slightly better predictive performance than TIMP-2 and IGFBP-7 combined, when only comparing the reported values by Koyner and Pianta (AUC improvement +0.01 and +0.02, respectively, average AUC improvement 0.015).

Urinary cystatin C (conc.) outperforms urinary IL-18 (conc.) in the pooled analysis, this gap diminishes when pairing those biomarkers (AUC improvement for Endre and Ralib -0.05 and +0.06, respectively, average AUC improvement 0.005). When urinary cystatin C and IL-18 were normalized to urinary creatinine, cystatin C still performs slightly better than IL-18 (AUC improvement -0.02, +0.08, respectively, average AUC improvement 0.03).

For urinary NGAL (norm.), which is outperformed by urinary cystatin C (norm.), a slight improvement can be noted when pairing it with cystatin C (norm.) (AUC improvement Endre +0.08, Ralib -0.04, average AUC improvement 0.02; note: only 2 of 7 studies for urinary NGAL considered for paired analysis, omitting 5 studies).

While urinary NGAL (norm.) is outperformed by urinary IL-18 (norm.) the opposite holds true for NGAL (conc.) and IL-18 (conc.). When pairing NGAL (conc.) and IL-18 (conc.), NGAL slightly outperforms IL-18 (AUC improvement Renhua +0.17, Koyner -0.11, Endre +0.04, average AUC improvement 0.035), while IL-18 (norm.) is slightly better than NGAL (norm.) (AUC improvement Endre +0.06, Ralib +0.04, average AUC improvement 0.05).

### 3.3. Subgroup analysis for biomarkers included in the meta-analysis

**Tab. 6** Subgroup analysis for plasma, serum and whole blood NGAL. Mixed ICU populations are ICU cohorts which include medical and surgical patients. Excluded from this category are studies only investigating specific patient cohorts for example after cardiac surgery, after renal transplantation, suffering from malaria etc. Difference means difference between pooled AUCs

|            | p/s/wb NGAL<br>(all studies) | mixed ICU<br>populations<br>only | cut-off 150-<br>350 ng/ml | cut-off >600<br>ng/ml | cut-off 150-<br>350 vs. >600<br>ng/ml |
|------------|------------------------------|----------------------------------|---------------------------|-----------------------|---------------------------------------|
| AUC        | 0.755                        | 0.747                            | 0.742                     | 0.779                 |                                       |
| (95%-CI)   | (0.706-0.803)                | (0.685-0.808)                    | (0.678-0.805)             | (0.689-0.870)         |                                       |
| Difference |                              | 0.008                            | 0.013                     | 0.024                 | 0.037                                 |
| p-value    |                              | 0.8413                           | 0.7964                    | 0.6469                | 0.5613                                |

**Fig. 15** Plasma, serum and whole blood NGAL. Subgroup analysis including only mixed ICU populations

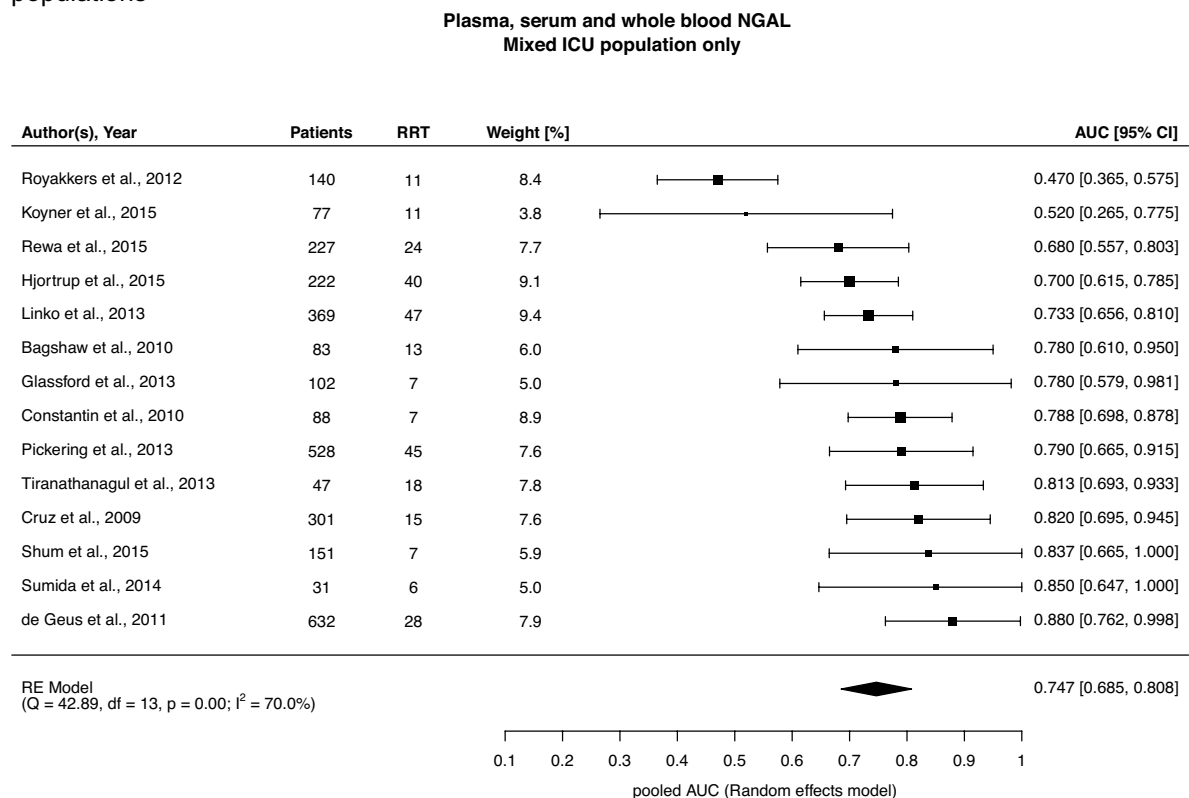

**Fig. 16** Subgroup analysis for different NGAL thresholds

**Fig. 16a** Plasma, serum and whole blood NGAL. Subgroup analysis including only studies with stated cut-off between 150 and 350 ng/ml

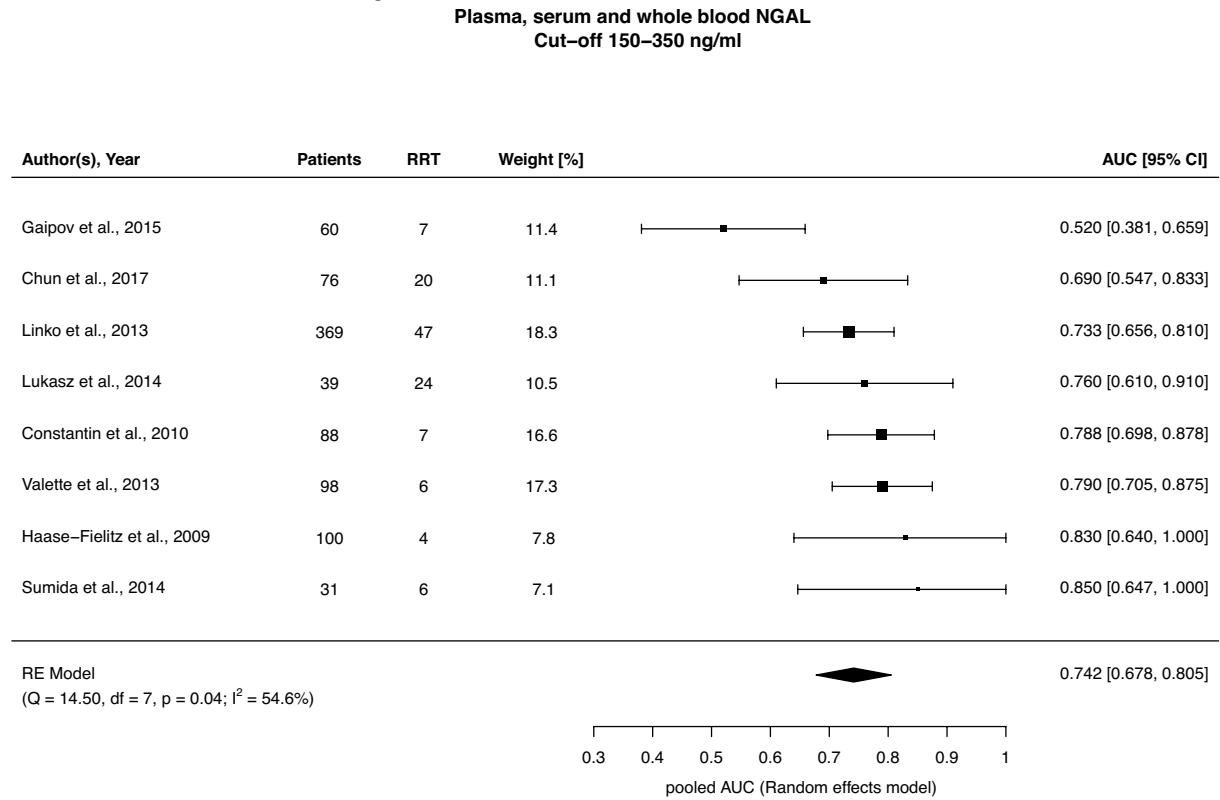

**Fig. 16b** Plasma, serum and whole blood NGAL. Subgroup analysis including studies with stated cut-off  $\geq 600$  ng/ml

**Plasma, serum and whole blood NGAL**  
**Cut-off  $>600$  ng/ml**

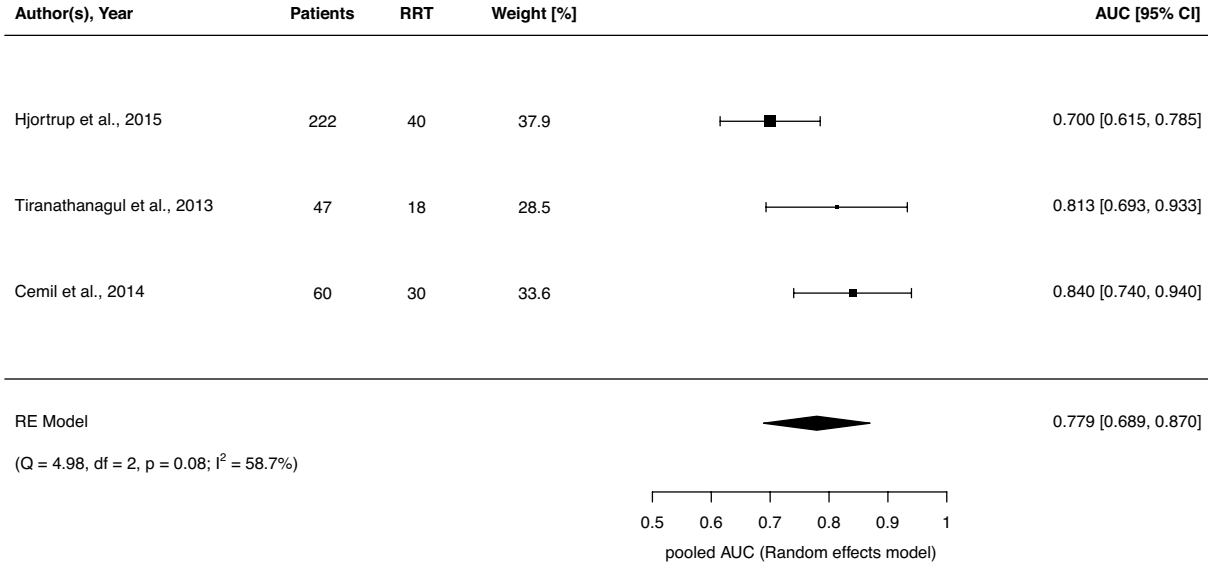



**Tab. 7** Subgroup analysis for plasma and serum creatinine. Differences between pooled AUCs

|            | p/s Cr<br>(all studies) | mixed ICU<br>populations<br>only |
|------------|-------------------------|----------------------------------|
| AUC        | 0.764                   | 0.736                            |
| (95%-CI)   | (0.732-0.796)           | (0.694-0.777)                    |
| Difference |                         | 0.028                            |
| p-value    |                         | 0.2950                           |

**Fig. 17** Plasma and serum creatinine. Subgroup analysis including only mixed ICU populations

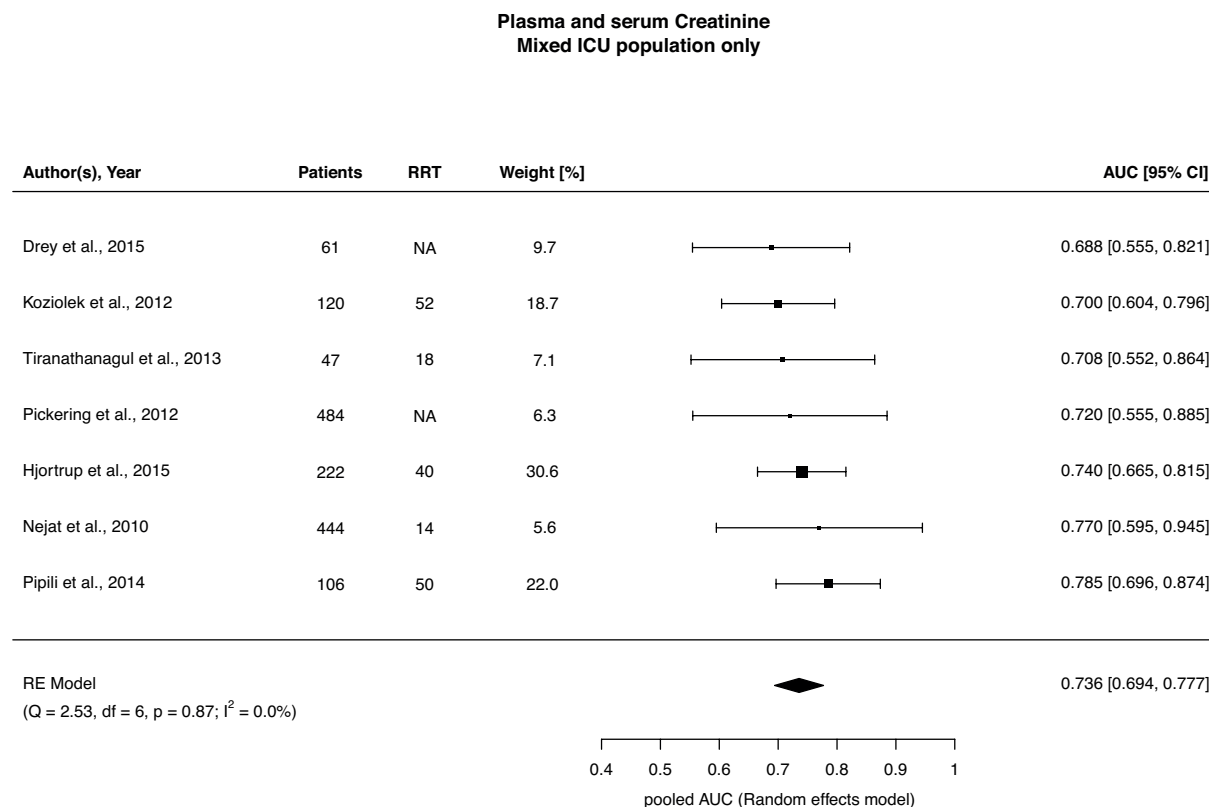

**Tab. 8** Subgroup analysis for plasma and serum Cystatin C. Differences between pooled AUCs

|            | p/s CysC<br>(all studies) | mixed ICU<br>populations<br>only |
|------------|---------------------------|----------------------------------|
| AUC        | 0.768                     | 0.755                            |
| (95%-CI)   | (0.729-0.807)             | (0.710-0.801)                    |
| Difference |                           | 0.013                            |
| p-value    |                           | 0.6706                           |

**Fig. 18** Plasma and serum Cystatin C. Subgroup analysis including only mixed ICU populations

**Plasma and serum Cystatin C  
Mixed ICU population only**

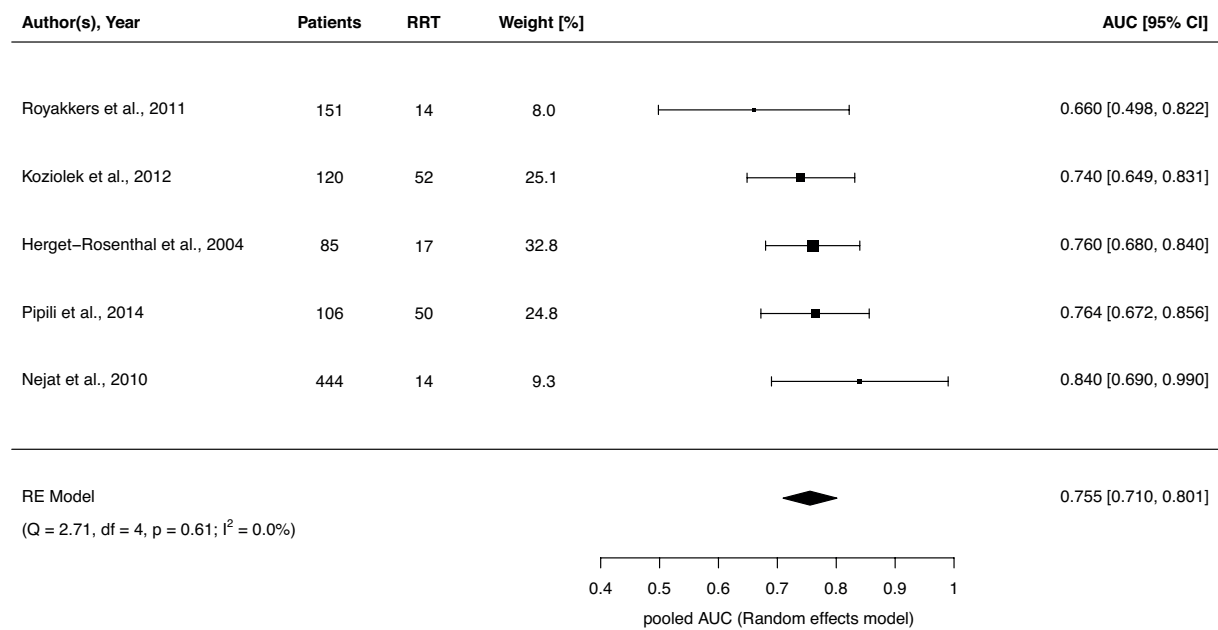

**Tab. 9** Subgroup analysis for urinary NGAL (concentration and normalized to urinary creatinine). Differences between pooled AUCs

|            | urinary NGAL<br>(concentration)<br>(all studies) | mixed ICU<br>populations<br>only | urinary NGAL<br>(normalized)<br>(all studies) | mixed ICU<br>populations<br>only |
|------------|--------------------------------------------------|----------------------------------|-----------------------------------------------|----------------------------------|
| AUC        | 0.720                                            | 0.721                            | 0.727                                         | 0.710                            |
| (95%-CI)   | (0.638-0.803)                                    | (0.589-0.853)                    | (0.678-0.776)                                 | (0.605-0.815)                    |
| Difference |                                                  | 0.001                            |                                               | 0.017                            |
| p-value    |                                                  | 0.9900                           |                                               | 0.7737                           |

**Fig. 19** Subgroup analysis for urinary NGAL (conc.) including only mixed ICU populations  
**Fig. 19a** Subgroup analysis including only mixed ICU populations for the urinary concentration of urinary NGAL

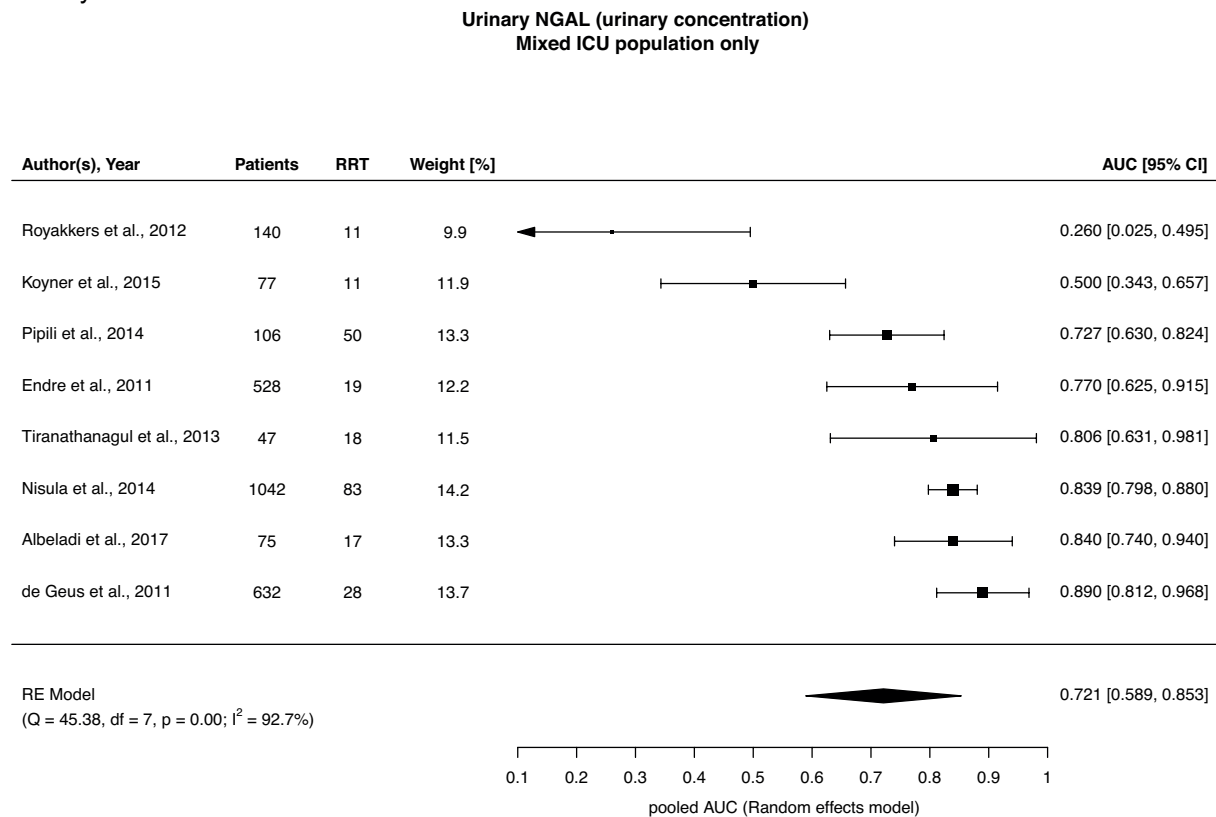

**Fig. 19b** Subgroup analysis including only mixed ICU populations for urinary NGAL normalized to urinary creatinine

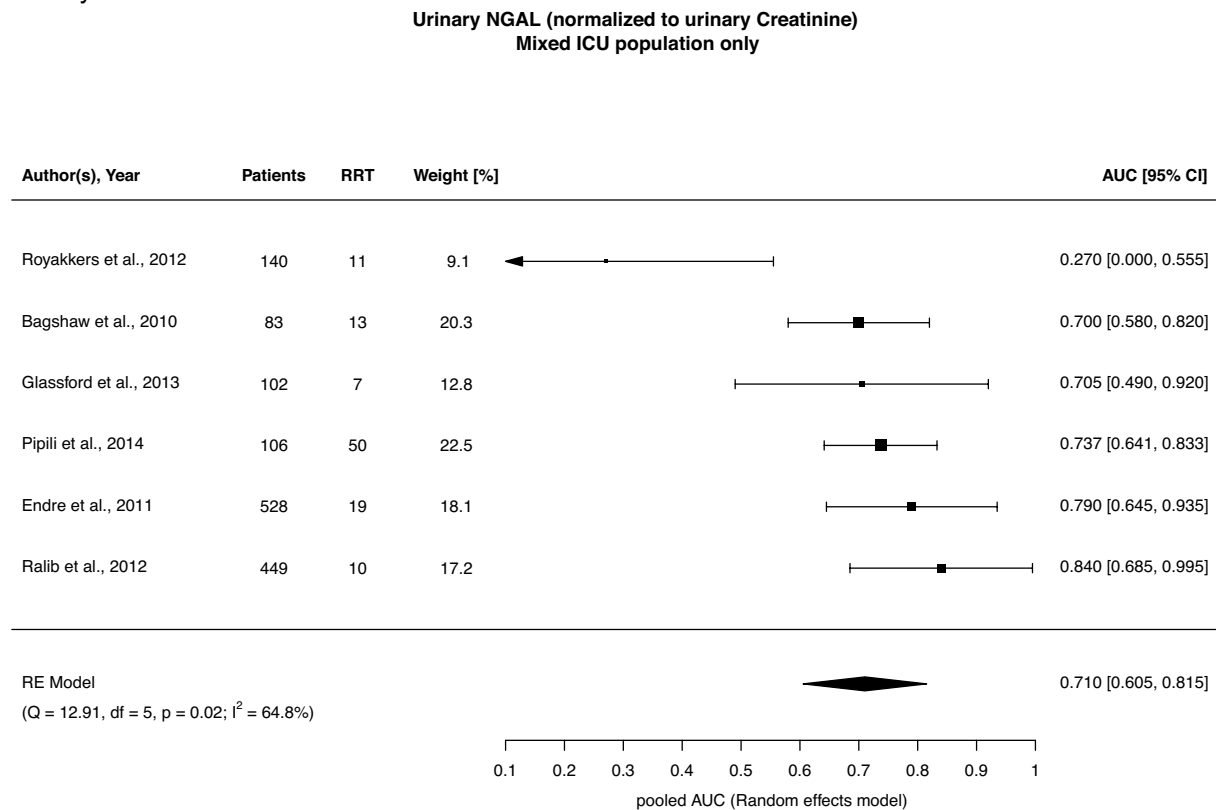

Supplement: 134_2018_5126_MOESM1_ESM.pdf [file 134_2018_5126_MOESM1_ESM.pdf]
