# Supplementary material for: Biomarkers for prediction of renal replacement therapy in acute kidney injury: a systematic review and meta-analysis
Source: Springer Nature journal article supplement (doi:10.1007/s00134-018-5126-8), 2018-03-01
Supplement: MOESM3 [file 15533690]

| Nr | Author/Year            | Group         | Biomarker                                    | urinary BM: adjusted (+)/unadjusted (-) to u Cr | time point of sample collection | RRT within | Patients n | RRT n | Cut-off  | Result | % CI  | CI lower | CI upper | p     | SE     | sensitivity |          | specificity |          | PPV      |          | NPV      |                      |
|----|------------------------|---------------|----------------------------------------------|-------------------------------------------------|---------------------------------|------------|------------|-------|----------|--------|-------|----------|----------|-------|--------|-------------|----------|-------------|----------|----------|----------|----------|----------------------|
|    |                        |               |                                              |                                                 |                                 |            |            |       |          |        |       |          |          |       |        | CI lower    | CI upper | CI lower    | CI upper | CI lower | CI upper | CI lower | CI upper             |
| 58 | Renov et al. 2016      | ICU           | sTM multivar.                                |                                                 | admission                       | 28 days    | 454        | 39    |          | HR     | 2.5   | 95       | 1.23     | 5.11  | 0.01   |             |          |             |          |          |          |          |                      |
| 58 | Renov et al. 2016      | ICU           | Procalcitonin univ.                          |                                                 | admission                       | 28 days    | 454        | 39    |          | HR     | 2.75  | 95       | 1.47     | 5.17  | 0.002  |             |          |             |          |          |          |          |                      |
| 58 | Renov et al. 2016      | ICU           | Procalcitonin multivar.                      |                                                 | admission                       | 28 days    | 454        | 39    |          | HR     | 0.84  | 95       | 0.42     | 1.68  | 0.62   |             |          |             |          |          |          |          |                      |
| 58 | Renov et al. 2016      | ICU           | Creatinine univ.                             |                                                 | admission                       | 28 days    | 454        | 39    |          | HR     | 7.08  | 95       | 3.64     | 13.79 | <0.001 |             |          |             |          |          |          |          |                      |
| 58 | Renov et al. 2016      | ICU           | Creatinine multivar.                         |                                                 | admission                       | 28 days    | 454        | 39    |          | HR     | 3.11  | 95       | 1.44     | 6.68  | 0.004  |             |          |             |          |          |          |          |                      |
| 58 | Renov et al. 2016      | ICU           | Vasopressor treatment univ.                  |                                                 | admission                       | 28 days    | 454        | 39    |          | HR     | 6.34  | 95       | 3.14     | 12.73 | <0.001 |             |          |             |          |          |          |          |                      |
| 58 | Renov et al. 2016      | ICU           | Vasopressor treatment multivar.              |                                                 | admission                       | 28 days    | 454        | 39    |          | HR     | 2.63  | 95       | 1.23     | 5.65  | 0.01   |             |          |             |          |          |          |          |                      |
| 58 | Renov et al. 2016      | ICU           | Platelets univ.                              |                                                 | admission                       | 28 days    | 454        | 39    |          | HR     | 2.78  | 95       | 1.48     | 5.22  | 0.001  |             |          |             |          |          |          |          |                      |
| 58 | Renov et al. 2016      | ICU           | Platelets multivar.                          |                                                 | admission                       | 28 days    | 454        | 39    |          | HR     | 1.42  | 95       | 0.7      | 2.88  | 0.33   |             |          |             |          |          |          |          |                      |
| 58 | Renov et al. 2016      | ICU           | Bilirubin univ.                              |                                                 | admission                       | 28 days    | 454        | 39    |          | HR     | 2.9   | 95       | 1.55     | 5.45  | 0.001  |             |          |             |          |          |          |          |                      |
| 58 | Renov et al. 2016      | ICU           | Bilirubin multivar.                          |                                                 | admission                       | 28 days    | 454        | 39    |          | HR     | 1.87  | 95       | 0.93     | 3.77  | 0.08   |             |          |             |          |          |          |          |                      |
| 58 | Renov et al. 2016      | ICU           | Mechanic ventilation univ.                   |                                                 | admission                       | 28 days    | 454        | 39    |          | HR     | 3.78  | 95       | 1.34     | 10.64 | 0.01   |             |          |             |          |          |          |          |                      |
| 58 | Renov et al. 2016      | ICU           | Mechanic ventilation multivar.               |                                                 | admission                       | 28 days    | 454        | 39    |          | HR     | 4.69  | 95       | 1.62     | 13.62 | 0.004  |             |          |             |          |          |          |          |                      |
| 58 | Renov et al. 2016      | ICU           | Age univ.                                    |                                                 | admission                       | 28 days    | 454        | 39    |          | HR     | 2.03  | 95       | 1.07     | 3.88  | 0.03   |             |          |             |          |          |          |          |                      |
| 58 | Renov et al. 2016      | ICU           | Age multivar.                                |                                                 | admission                       | 28 days    | 454        | 39    |          | HR     | 1.62  | 95       | 0.84     | 3.15  | 0.15   |             |          |             |          |          |          |          |                      |
| 58 | Renov et al. 2016      | ICU           | Sex univ.                                    |                                                 | admission                       | 28 days    | 454        | 39    |          | HR     | 1.53  | 95       | 0.77     | 3.02  | 0.22   |             |          |             |          |          |          |          |                      |
| 58 | Renov et al. 2016      | ICU           | Sex multivar.                                |                                                 | admission                       | 28 days    | 454        | 39    |          | HR     | 1.34  | 95       | 0.64     | 2.81  | 0.44   |             |          |             |          |          |          |          |                      |
| 59 | O'Sullivan et al. 2017 | ICU           | kgFR                                         |                                                 | kinetic                         |            | 107        | 16    |          | AUC    | 0.901 | 95       | 0.82     | 0.97  |        | 0.87        |          | 0.85        |          |          |          |          |                      |
| 59 | O'Sullivan et al. 2017 | ICU           | MDRD                                         |                                                 | N/A                             |            | 107        | 16    |          | AUC    | 0.79  | 95       | 0.66     | 0.92  |        | 0.56        |          | 0.91        |          |          |          |          |                      |
| 60 | Plewes et al. 2017     | ICU/gen. ward | CFH univ.                                    |                                                 | N/A                             |            | 107        | 32    |          | OR     | 1.01  | 95       | 0.99     | 1     | 0.063  |             |          |             |          |          |          |          |                      |
| 60 | Plewes et al. 2017     | ICU/gen. ward | CFH Multivar. Isof model                     |                                                 | N/A                             |            | 107        | 32    |          | OR     | 1.06  | 95       | 0.98     | 1.14  | 0.156  |             |          |             |          |          |          |          |                      |
| 60 | Plewes et al. 2017     | ICU/gen. ward | Log F2-IsoP univ.                            |                                                 | N/A                             |            | 107        | 32    |          | OR     | 3.45  | 95       | 1.3      | 9.18  | 0.013  |             |          |             |          |          |          |          |                      |
| 60 | Plewes et al. 2017     | ICU/gen. ward | Log F2-IsoP multivar. F2-IsoP model          |                                                 | N/A                             |            | 107        | 32    |          | OR     | 7.37  | 95       | 1.86     | 29.23 | 0.005  |             |          |             |          |          |          |          |                      |
| 60 | Plewes et al. 2017     | ICU/gen. ward | Log Isof univ.                               |                                                 | N/A                             |            | 107        | 32    |          | OR     | 3.48  | 95       | 1.62     | 7.69  | 0.001  |             |          |             |          |          |          |          |                      |
| 60 | Plewes et al. 2017     | ICU/gen. ward | Log Isof Multivar. Isof model                |                                                 | N/A                             |            | 107        | 32    |          | OR     | 5.5   | 95       | 1.76     | 17.24 | 0.003  |             |          |             |          |          |          |          |                      |
| 60 | Plewes et al. 2017     | ICU/gen. ward | Log PPHR2 univ.                              |                                                 | N/A                             |            | 107        | 32    |          | OR     | 1.92  | 95       | 1.27     | 2.91  | 0.002  |             |          |             |          |          |          |          |                      |
| 60 | Plewes et al. 2017     | ICU/gen. ward | LogRCD at SS 1.69 Pa univ.                   |                                                 | N/A                             |            | 107        | 32    |          | OR     | 0.29  | 95       | 0.08     | 1.09  | 0.066  |             |          |             |          |          |          |          |                      |
| 60 | Plewes et al. 2017     | ICU/gen. ward | LogRCD at SS 9.49 Pa univ.                   |                                                 | N/A                             |            | 107        | 32    |          | OR     | 0.1   | 95       | 0.01     | 0.75  | 0.025  |             |          |             |          |          |          |          |                      |
| 60 | Plewes et al. 2017     | ICU/gen. ward | LogRCD at SS 9.49 Pa multivar. F2-IsoP model |                                                 | N/A                             |            | 107        | 32    |          | OR     | 0.057 | 95       | 0.002    | 1.33  | 0.075  |             |          |             |          |          |          |          |                      |
| 60 | Plewes et al. 2017     | ICU/gen. ward | LogRCD at SS 9.49 Pa Multivar. Isof model    |                                                 | N/A                             |            | 107        | 32    |          | OR     | 31    | 95       | 0.001    | 1.44  | 0.076  |             |          |             |          |          |          |          |                      |
| 60 | Plewes et al. 2017     | ICU/gen. ward | Age univ.                                    |                                                 | N/A                             |            | 107        | 32    |          | OR     | 1     | 95       | 0.97     | 1.03  | 0.94   |             |          |             |          |          |          |          |                      |
| 60 | Plewes et al. 2017     | ICU/gen. ward | SBP univ.                                    |                                                 | N/A                             |            | 107        | 32    |          | OR     | 1.02  | 95       | 0.99     | 1.04  | 0.26   |             |          |             |          |          |          |          |                      |
| 60 | Plewes et al. 2017     | ICU/gen. ward | Numb. of severity criteria univ.             |                                                 | N/A                             |            | 107        | 32    |          | OR     | 1.9   | 95       | 1.38     | 2.62  | <0.001 |             |          |             |          |          |          |          |                      |
| 60 | Plewes et al. 2017     | ICU/gen. ward | GCS univ.                                    |                                                 | N/A                             |            | 107        | 32    |          | OR     | 0.95  | 95       | 0.85     | 1.07  | 0.393  |             |          |             |          |          |          |          |                      |
| 60 | Plewes et al. 2017     | ICU/gen. ward | LogLactate univ.                             |                                                 | N/A                             |            | 107        | 32    |          | OR     | 1.22  | 95       | 0.64     | 2.3   | 0.548  |             |          |             |          |          |          |          |                      |
| 61 | Hu et al. 2017         | Surgical ICU  | u CX3                                        | N/A                                             | admission                       |            | 125        | 18    |          | AUC    | 0.778 | 95       | 0.671    | 0.885 |        |             |          |             |          |          |          |          |                      |
| 61 | Hu et al. 2017         | Surgical ICU  | u ND1                                        | N/A                                             | admission                       |            | 125        | 18    |          | AUC    | 0.762 | 95       | 0.642    | 0.882 |        |             |          |             |          |          |          |          |                      |
| 62 | Kim et al. 2017        | Sepsis        | p PENK                                       |                                                 | day of sepsis diagnosis         |            | 167        | 24    |          | AUC    | 0.872 |          |          |       |        |             |          |             |          |          |          |          |                      |
| 62 | Kim et al. 2017        | Sepsis        | p NGAL                                       |                                                 | day of sepsis diagnosis         |            | 167        | 24    |          | AUC    | 0.741 |          |          |       |        |             |          |             |          |          |          |          |                      |
| 63 | Mårtensson et al. 2017 | ICU           | p Endostatin (all patients)                  |                                                 | 0-h samples                     |            | 1112       | 103   | 37 ng/ml | AUC    | 0.67  | 95       | 0.61     | 0.73  |        | 38.8        | 29.4     | 48.9        | 90.1     | 88.1     | 91.9     |          | LR+ 3.92 (2.89-5.32) |
| 63 | Mårtensson et al. 2017 | ICU           | p Endostatin (septic patients)               |                                                 | 0-h samples                     |            | 276        | 41    | 37 ng/ml | AUC    | 0.63  | 95       | 0.53     | 0.73  |        | 41.5        | 26.3     | 57.9        | 79.1     | 73.4     | 84.2     |          | LR+ 1.99 (1.28-3.09) |
| 63 | Mårtensson et al. 2017 | ICU           | p Endostatin (nonseptic patients)            |                                                 | 0-h samples                     |            | 836        | 62    | 37 ng/ml | AUC    | 0.66  | 95       | 0.57     | 0.75  |        | 37.1        | 25.2     | 50.3        | 93.4     | 91.4     | 95.1     |          | LR+ 5.63 (3.70-8.56) |
| 63 | Mårtensson et al. 2017 | ICU           | p Endostatin (CKD patients)                  |                                                 | 0-h samples                     |            | 67         | 15    | 37 ng/ml | AUC    | 0.75  | 95       | 0.58     | 0.92  |        | 73.3        | 44.9     | 92.2        | 53.8     | 39.5     | 67.8     |          | LR+ 1.59 (1.04-2.43) |
| 63 | Mårtensson et al. 2017 | ICU           | p Endostatin (non-CKD patients)              |                                                 | 0-h samples                     |            | 1040       | 85    | 37 ng/ml | AUC    | 0.64  | 95       | 0.57     | 0.71  |        | 31.8        | 22.1     | 42.8        | 92       | 90.1     | 93.7     |          | LR+ 3.99 (2.73-5.83) |
