# Supplementary material for: Biomarkers for prediction of renal replacement therapy in acute kidney injury: a systematic review and meta-analysis
Source: Springer Nature journal article supplement (doi:10.1007/s00134-018-5126-8), 2018-03-01
Supplement: MOESM4 [file 15533690]

# QUADAS-2 (adapted version)

## Phase 1: State the review question:

|                                                                                                                                                                                                                                                                                                   |
|---------------------------------------------------------------------------------------------------------------------------------------------------------------------------------------------------------------------------------------------------------------------------------------------------|
| Patients (setting, intended use of index test, presentation, prior testing): <ul style="list-style-type: none"><li>• Critically ill patients with AKI needing RRT</li><li>• Intended use of index test is to predict the necessity of RRT</li></ul>                                               |
| Index test(s): <ul style="list-style-type: none"><li>• Every biomarker evaluated in the identified studies</li></ul>                                                                                                                                                                              |
| Reference standard and target condition: <ul style="list-style-type: none"><li>• (Since there is no reference standard for determination of necessity of RRT, we excluded this question in our adapted version of the QUADAS-2)</li><li>• The target condition is the initiation of RRT</li></ul> |

## Phase 2: Draw a flow diagram for the primary study



## DOMAIN 1: PATIENT SELECTION

### A. Risk of Bias

|                                                              |                               |
|--------------------------------------------------------------|-------------------------------|
| Describe methods of patient selection:                       |                               |
| • Was a consecutive or random sample of patients enrolled?   | Yes/No/Unclear                |
| • Was a case-control design avoided                          | Yes/No/Unclear                |
| • Did the study avoid inappropriate exclusions?              | Yes/No/Unclear                |
| <b>Could the selection of patients have introduced bias?</b> | <b>RISK: LOW/HIGH/UNCLEAR</b> |

### B. Concerns regarding applicability

|                                                                                                   |                                  |
|---------------------------------------------------------------------------------------------------|----------------------------------|
| Describe included patients (prior testing, presentation, intended use of index test and setting): |                                  |
| <b>Is there concern that the included patients do not match the review question?</b>              | <b>CONCERN: LOW/HIGH/UNCLEAR</b> |

## DOMAIN 2: INDEX TEST(S)

If more than one index test was used, please complete for each test.

### A. Risk of Bias

|                                                                                    |                               |
|------------------------------------------------------------------------------------|-------------------------------|
| Describe the index test and how it was conducted and interpreted:                  |                               |
| • Was the laboratory personal blinded to the patient's condition?                  | Yes/No/Unclear                |
| • If a threshold was used, was it pre-specified?                                   | Yes/No/Unclear                |
| <b>Could the conduct or interpretation of the index test have introduced bias?</b> | <b>RISK: LOW/HIGH/UNCLEAR</b> |

### B. Concerns regarding applicability

|                                                                                                              |                                  |
|--------------------------------------------------------------------------------------------------------------|----------------------------------|
| <b>Is there concern that the index test, its conduct, or interpretation differ from the review question?</b> | <b>CONCERN: LOW/HIGH/UNCLEAR</b> |
|--------------------------------------------------------------------------------------------------------------|----------------------------------|

## DOMAIN 3: RRT INITIATION

### A. Risk of Bias

|                                                                                                 |                               |
|-------------------------------------------------------------------------------------------------|-------------------------------|
| Describe the criteria used for RRT initiation:                                                  |                               |
| • Are the criteria likely to correctly classify the need for RRT initiation?                    | Yes/No/Unclear                |
| • Was the decision to initiate RRT made without knowledge of the results of the index test(s)?  | Yes/No/Unclear                |
| <b>Could the criteria used for RRT initiation or their interpretation have introduced bias?</b> | <b>RISK: LOW/HIGH/UNCLEAR</b> |

**B. Concerns regarding applicability**

|                                                                                                                    |                                  |
|--------------------------------------------------------------------------------------------------------------------|----------------------------------|
| Is there concern that the target condition as defined by the initiation of RRT does not match the review question? | <b>CONCERN: LOW/HIGH/UNCLEAR</b> |
|--------------------------------------------------------------------------------------------------------------------|----------------------------------|

**DOMAIN 4: FLOW AND TIMING****A. Risk of Bias**

|                                                                                                                              |                               |
|------------------------------------------------------------------------------------------------------------------------------|-------------------------------|
| Describe any patients who did not receive the index test(s) or who were excluded from the 2x2 table (refer to flow diagram): |                               |
| • Was there an appropriate interval between critical illness and RRT?                                                        | Yes/No/Unclear                |
| • Did all patients needing RRT receive it?                                                                                   | Yes/No/Unclear                |
| • Were all patients included in the analysis?                                                                                | Yes/No/Unclear                |
| <b>Could the patient flow have introduced bias?</b>                                                                          | <b>RISK: LOW/HIGH/UNCLEAR</b> |
